# Supplementary material for: Cis-regulatory evolution spotlights species differences in the adaptive potential of gene expression plasticity
Source: PubMed Central journal article supplement (PMC8184852; doi:10.1038/s41467-021-23558-2), 2021-06-07
Supplement: 41467_2021_23558_MOESM1_ESM.pdf [file 41467_2021_23558_MOESM1_ESM.pdf]

## Supplementary information

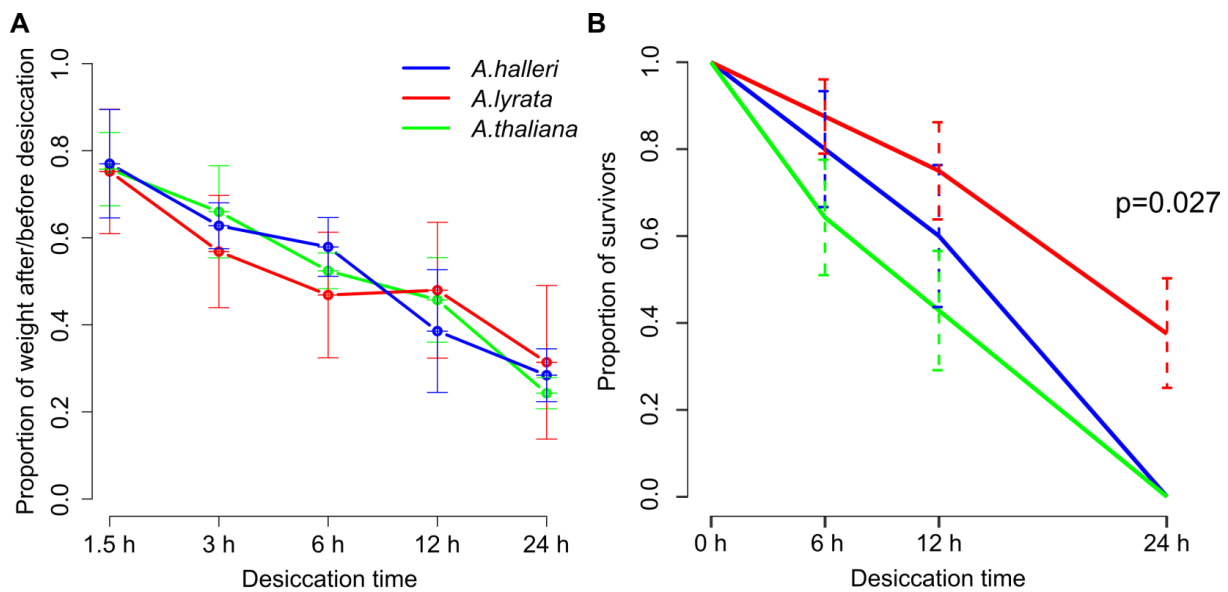

Supplementary Figure 1: (A) **The rate of water loss after 1.5 to 24h of desiccation is similar between the species.** The rate of water loss was inferred by the ratio of plant weight after / before the desiccation stress. Samples were weighted before the initiation of stress and immediately prior to RNA sampling. Species did not differ significantly in their rate of water loss (error bars indicate standard deviation, Interaction term species:duration of dehydration ,  $F=0.562$ ,  $p=0.803$ , glm model). Data shown in Supplementary Data 1.

(B) ***A. lyrata* is the most resistant to acute dehydration.** We performed the same dehydration experiment as for the transcriptome analysis, but instead of sampling material, we repotted the plants after 0h, 6h, 12h and 24h of dehydration and measured survival after 18 days. The survival rate after stress among species was significantly different and after 24h of dehydration, only *A. lyrata* survived (interaction term species:duration of dehydration in glm model,  $F_{6,111}= 8.71$ ,  $p= 8.841e-08$ ). This experiment included a representative set of 10, 17 and 14 genotypes of *A. halleri*, *A. lyrata* and *A. thaliana*, respectively (Supplementary Table 8). Data shown in Supplementary Data 2.

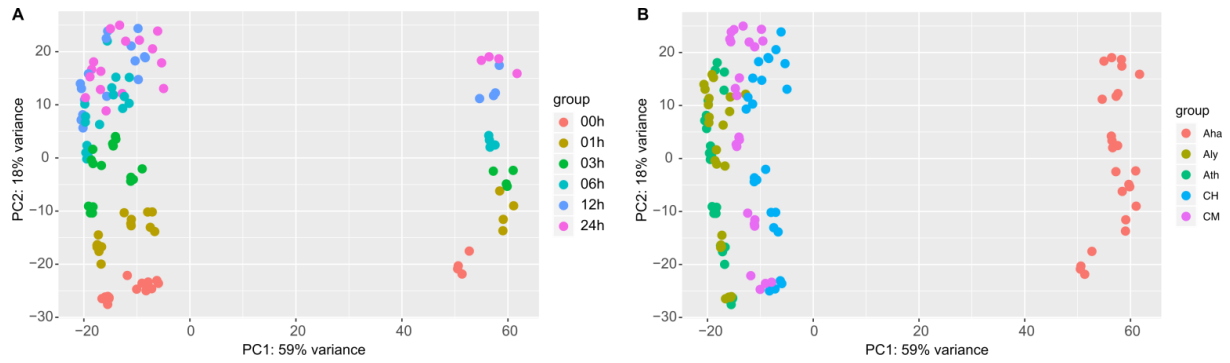

Supplementary Figure 2. **Differences between species and time points have a clear genetic basis.** Principal component analysis (PCA) of the 120 transcriptome samples collected over a desiccation time course for three species and two of their hybrids colored by A) time points and B) species (Aha – *A. halleri*, Aly – *A. lyrata*, Ath – *A. thaliana*, CH – F1 *A. thaliana* x *A. halleri*, CM – F1 *A. thaliana* x *A. lyrata*). The PCA separates the samples by species (PC1 59% variance) and by time-points (PC2 18% variance).

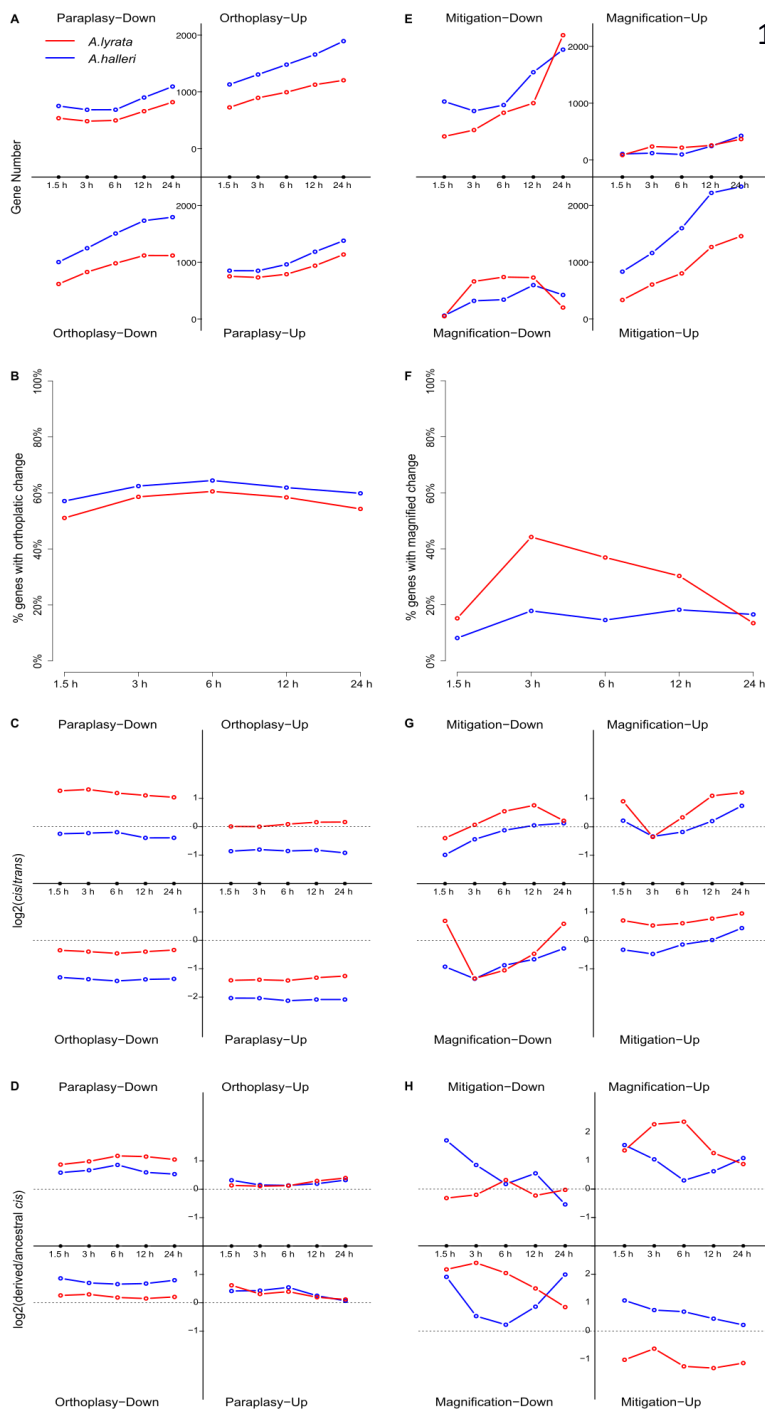

1

Supplementary Figure 3. Extension of Figure 2 and 3 to all time points of the experiment. Basal changes (A – D) and plastic responses to the stress (E – H) in *A. lyrata* or *A. halleri*, compared to *A. thaliana*. (A) The number of genes with a basal change in the direction (ortho-) or opposite (para-) to the direction of the stress reaction in *A. thaliana* increases over the time course. (B) The proportion of genes with an orthoplastic change is not dependent on the time point at which plasticity is determined. (C) The proportion of basal changes explained by *cis*-acting differences is not dependent on the time point at which plasticity is determined. (D) The proportion of basal changes explained by a derived *cis* is not dependent on the time point at which plasticity is observed. (E) The number of genes with a mitigated response increase during the time course. The number of genes with a magnified response do not increase to the same extent. (F) In *A. halleri*, the proportion of genes with a magnified response is not dependent on the time point, whereas in *A. lyrata* the proportion of magnified genes is increased between 6 and 12 hours. (G) The proportion of responses to the stress explained by plastic *cis*-acting differences is dependent on the time point in *A. lyrata*. (H) The proportion of responses to the stress explained by derived *cis*-acting changes is dependent on the time point.

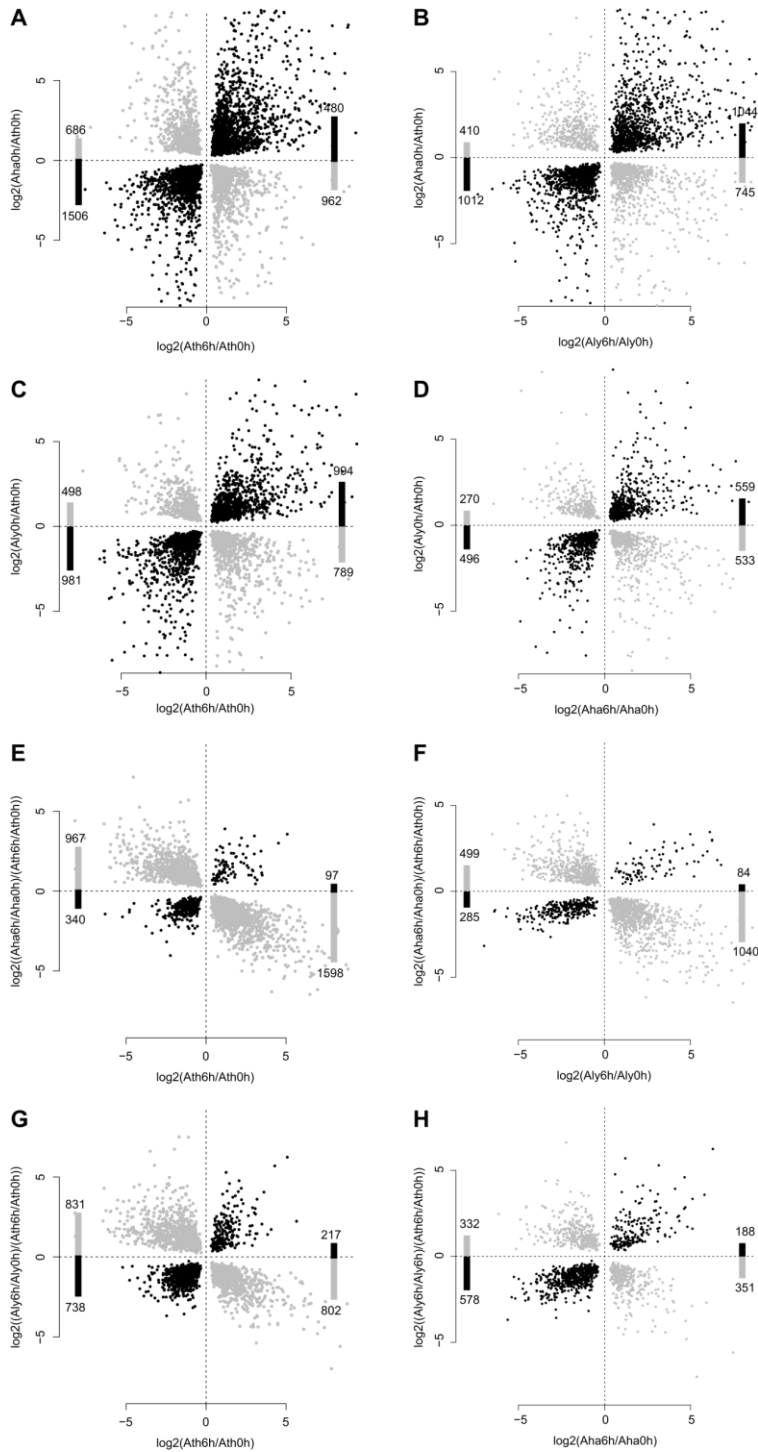

**Supplementary Figure 4.** Orthoplastic evolution of basal (A – D) gene expression in *A. lyrata* or *A. halleri* is robust to the species used for comparison. A mitigated response to stress in *A. halleri* is robust to the proxy used for plastic changes (E – F). This is not the case in *A. lyrata* (G-H). A-B: Basal changes in *A. halleri* vs *A. thaliana* using *A. thaliana* (A) and *A. lyrata* (B) as a comparison.

C-D: Basal changes in *A. lyrata* vs *A. thaliana* using *A. thaliana* (C) and *A. halleri* (D) as a comparison.

E-F: Plastic changes in *A. halleri* using *A. thaliana* (E) and *A. lyrata* (F) as a comparison.

G-H: Plastic changes in *A. lyrata* using *A. thaliana* (E) and *A. halleri* (F) as a comparison.

A-D: orthoplastic: black, paraplasic: grey

E-H: magnification: black, mitigation: grey

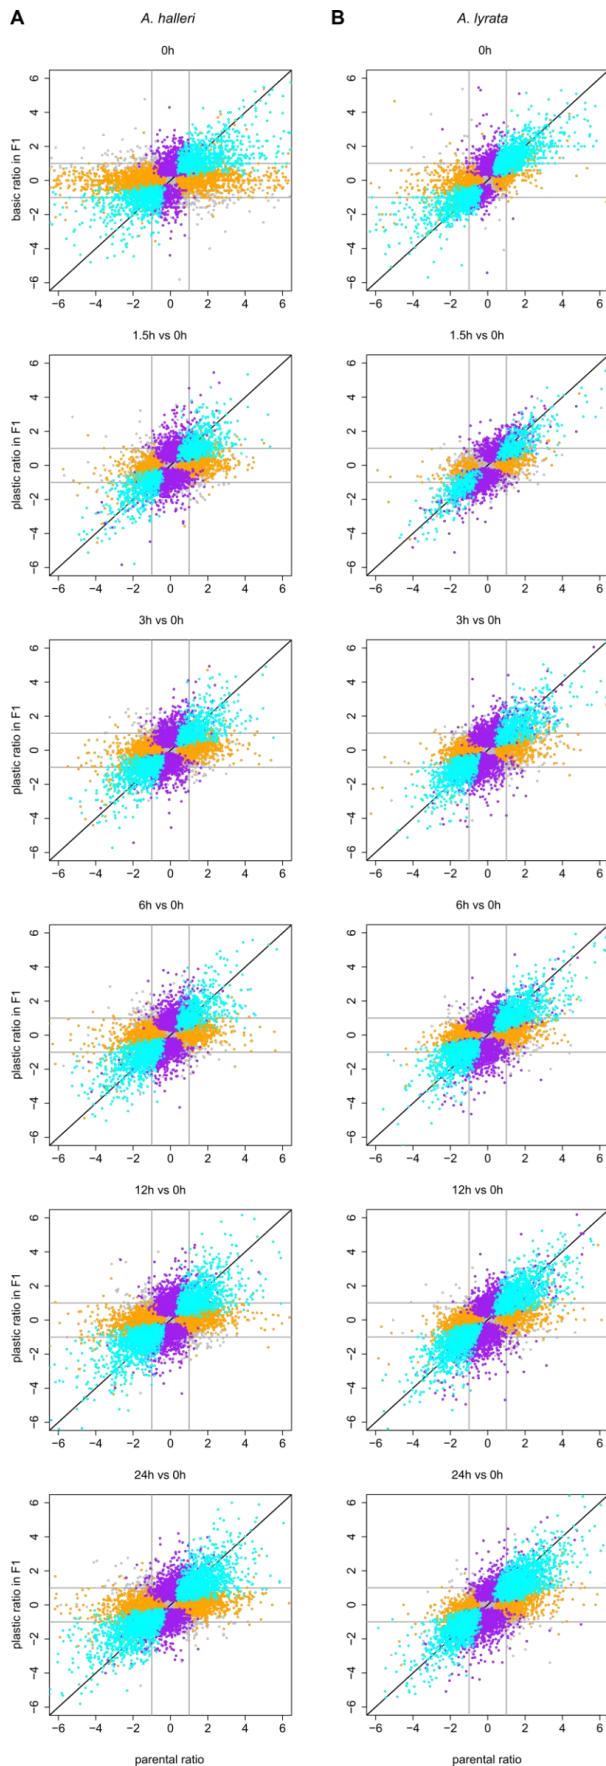

Supplementary Figure 5. **Cis** regulatory changes explain a large part of the interspecific differences between the species. (A) *A. halleri*. (B) *A. lyrata*. Cyan: *cis* change explains most of the parental difference; Orange parental difference are not associated with a bias in allele specific expression and thus assumed to be controlled in trans- (no significant *cis*-acting change); purple: Significant *cis*-acting changes are detected but the difference between parents is not significant. The allele-specific expression ratio of purple genes is however strongly correlated with the parental expression ratio, indicating that this class of genes reflect lower power for detecting parental differences (shown in Supplementary Table 8).

At 0h, the genetic basis of regulatory differences in basal expression is shown by plotting  $\log_2$ ratio of *A. halleri/A. thaliana* or *A. lyrata/A. thaliana* of alleles in the hybrid (y-axis) against the ratio of parental expression (x-axis). From 1.5h to 24h, the genetic basis of regulatory changes is determined by comparing ratio of  $\log_2$  ratios at xh vs. 0h for *A. halleri/A. thaliana* or *A. lyrata/A. thaliana* alleles in hybrid (y-axis) with parents (x-axis) at each time point.

Pearson correlations for *cis* (cyan), non-*cis* (trans; orange) and purple (compensatory; *cis*-change but no significant parental difference) are shown in Supplementary Table 8.

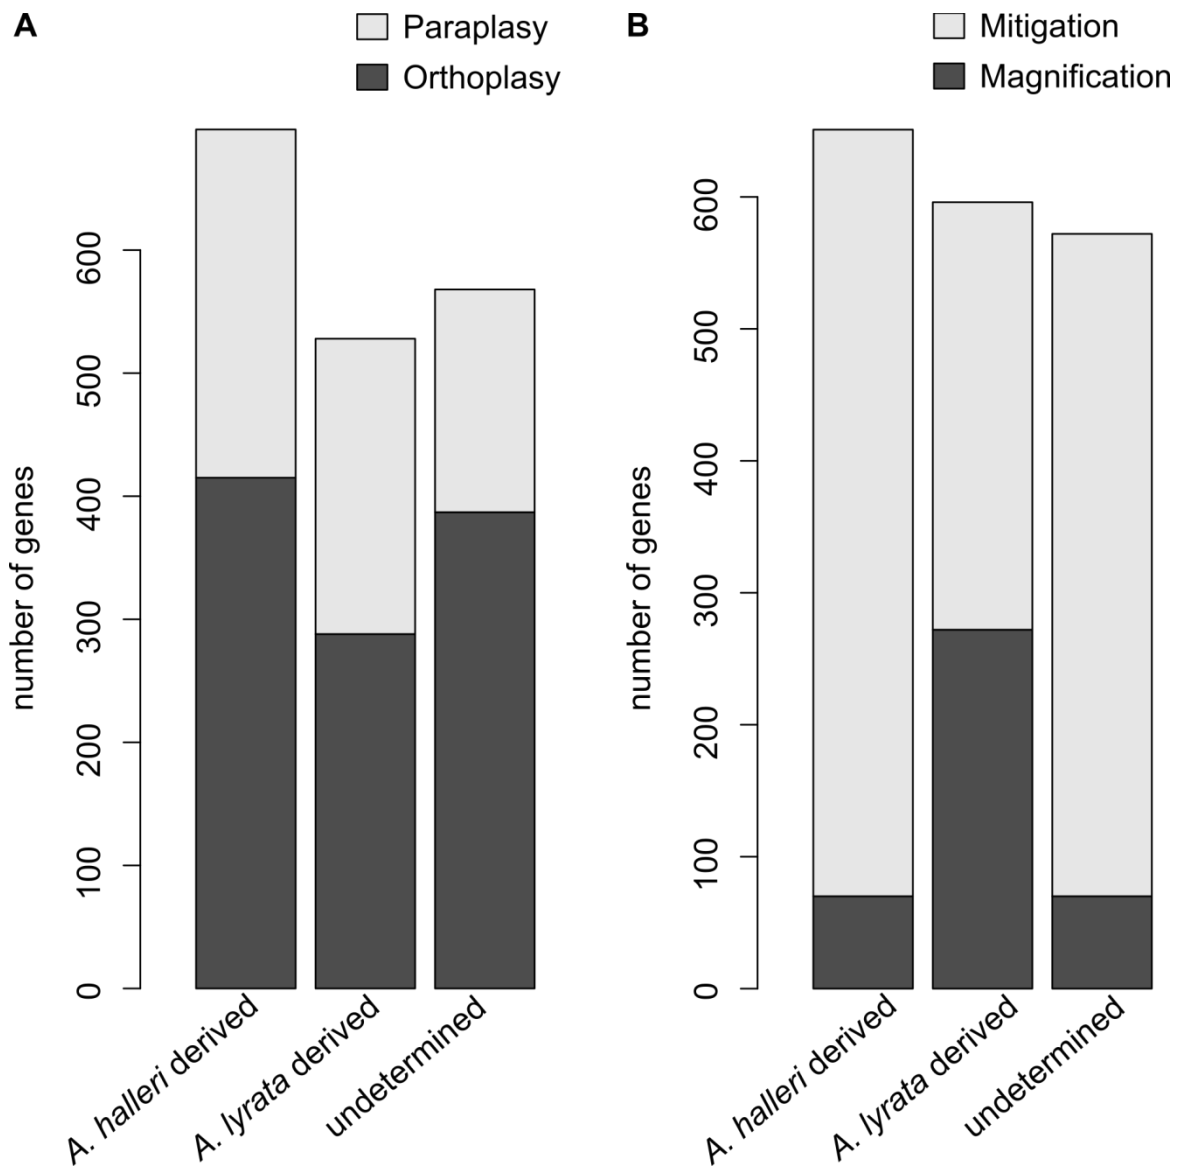

Supplementary Figure 6. **The total number of genes with derived and undetermined *cis*-regulatory changes are similar.** The number of genes that have (A) a basal change and either an undetermined or derived *cis*-regulatory change or a (B) plastic response and either an undetermined or derived *cis*-regulatory change. Genes are partitioned by the direction of the *cis*-acting effect detected in basal expression (A) or in the response slope (B). The proportions from Figure 4C are based on these numbers. Because the direction of effect of *cis*-regulatory changes of undetermined origin cannot be ascertained, the number of genes with these changes are not partitioned functionally.

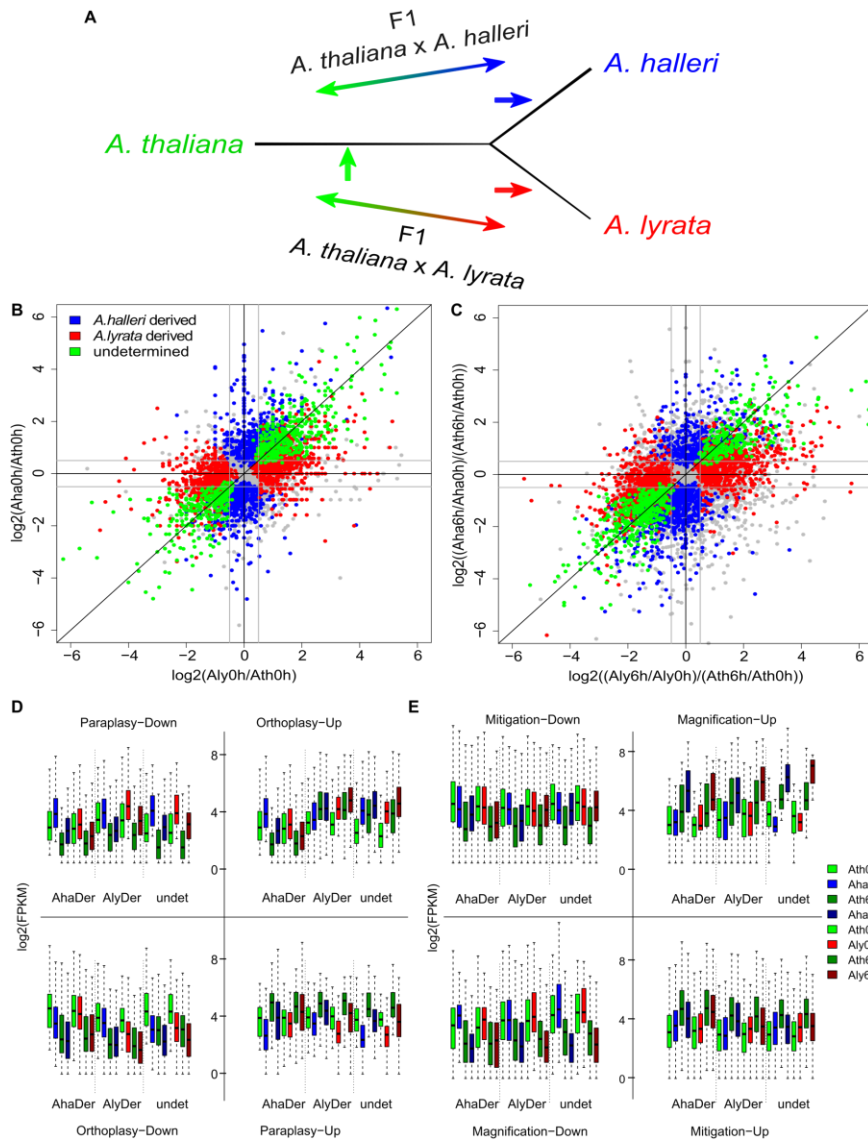

Supplementary Figure 7. The phylogenetic origin of *cis*-acting changes was determined based on the comparison of allele-specific expression ratios in the two F1 hybrids *A. thaliana*-*A. lyrata* and *A. thaliana*-*A. halleri*. (A) Phylogenetic relationship between the three species allowed distinguishing *cis*-acting changes of undetermined origin (green arrow), which are shared in the two F1 hybrids, from the derived *cis*-acting changes, which are specific (blue and red arrow). Also shown in Figure 4B. (B) basal and (C) plastic *cis*-acting changes. Log<sub>2</sub> allelic ratios in AthxAha hybrids plotted against log<sub>2</sub> allelic ratios in AthxAly hybrids in basal *cis* mutations (B), genes with an undetermined *cis*-regulatory change are on the diagonal (green), genes with a derived *cis*-regulatory change in *Arabidopsis lyrata* are on the horizontal central lines (red) and genes with a derived *cis*-regulatory change in *A. halleri* are on the vertical line (blue). Log<sub>2</sub> of allelic ratio changes between 6h and 0h in AthxAha hybrids plotted against log<sub>2</sub> allelic ratio changes in AthxAly hybrids in plastic *cis* mutations

(C). Box and whiskers depict the 75<sup>th</sup> and 95<sup>th</sup> interquartile ranges, respectively, dots show outliers.

**The inferred phylogenetic inference of derived *cis*-acting changes is independent of read count levels.**

D). The total expression level before stress for the orthoplastic and paraplastic genes in the F1 hybrids. Dark colors are for time point 6h, light colors for time point 0 hours.

*A. thaliana*: green, *A. halleri*: blue and *A. lyrata*: red. E). The total expression level before and

after stress for the magnified and mitigated genes in the F1 hybrids. Dark colors are for time point 6h, light colors for time point 0 hours. *A. thaliana*: green, *A. halleri*: blue and *A. lyrata*:

red.



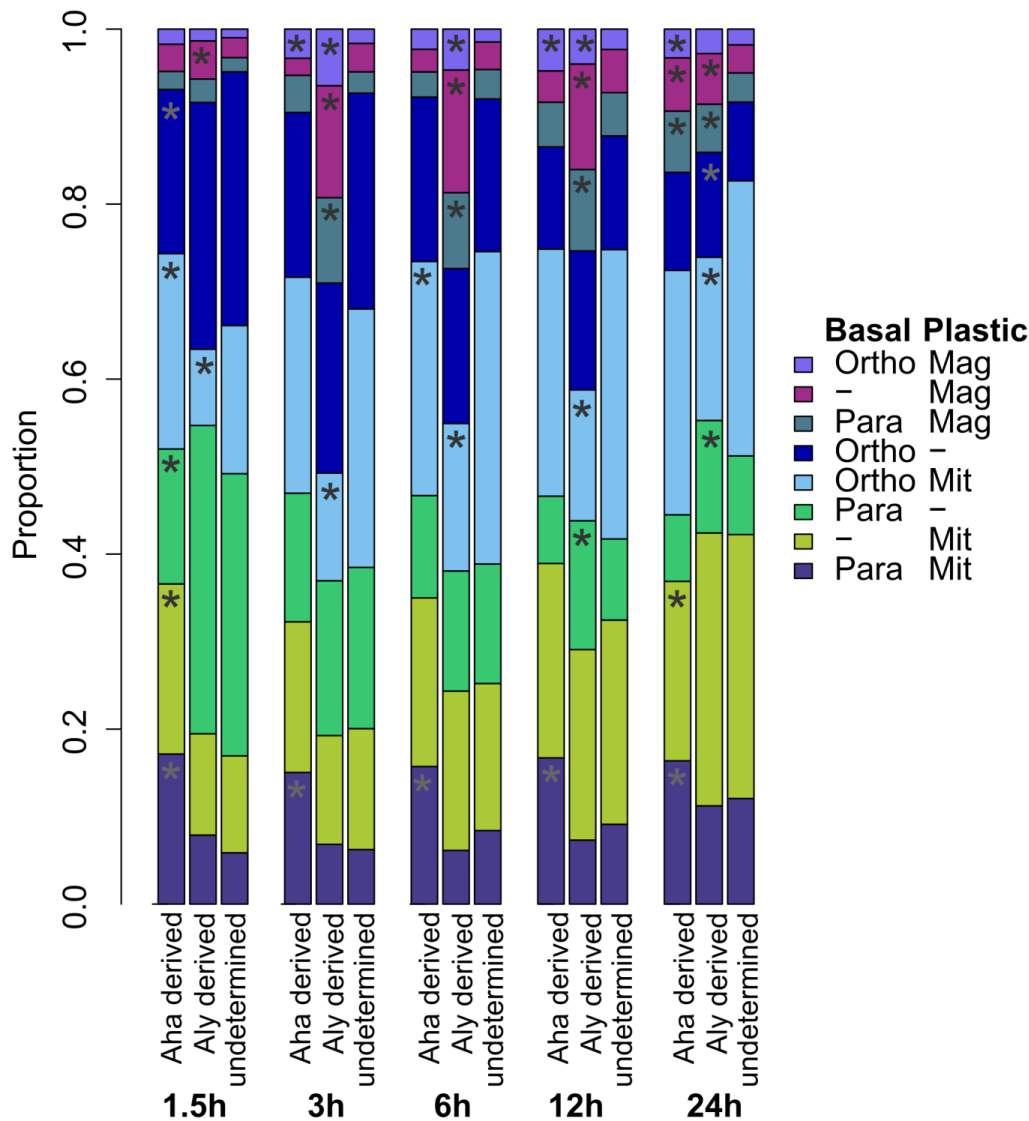

Supplementary Figure 8. **The pattern reported in Figure 4C is also apparent in samples collected after 3h or 12h.**

Ortho-Mag: orthoplasmy and magnification, Ortho-Mit: orthoplasmy and mitigation, Para-mit: paraplasmy and mitigation, Para-Mag: paraplasmy and magnification, Only-Mag: magnification only, Only-mit: Mitigation only, Only-Ortho: Orthoplasmy only, Only-Para: Paraplasmy only.

The proportion of derived and undetermined *cis*-regulatory modifications observed after 6h within each class of genes combining basal and/or plastic expression changes is similar after 3h or 12h of desiccation stress, at the time points where the largest numbers of genes are observed that show a magnified response to stress. Aha - *A. halleri*, Aly- *A. lyrata*.

“\*”: Significantly increased or decreased number of derived compared to undetermined changes in *A. halleri* or *A. lyrata* at each time point.

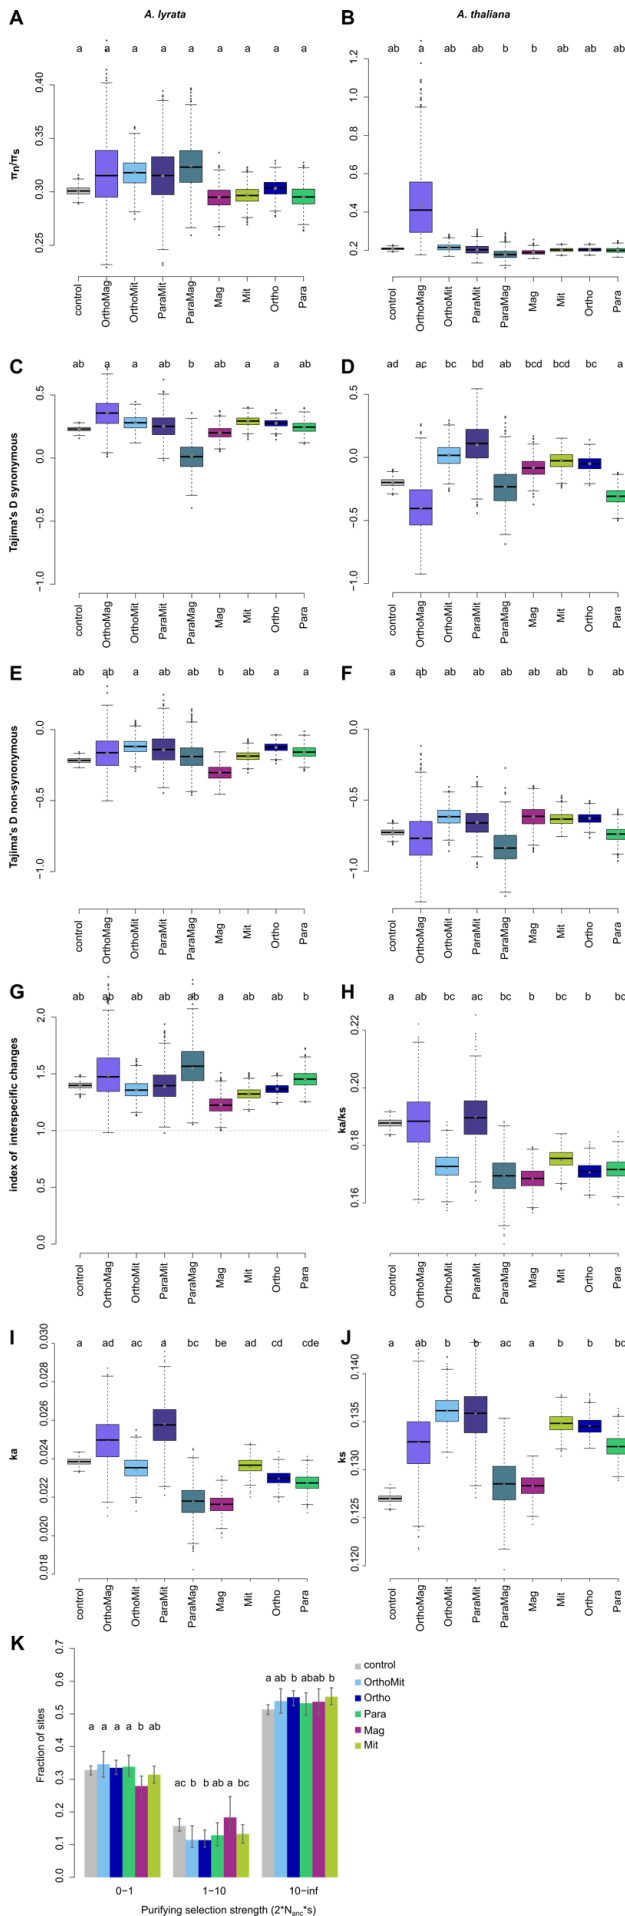

Supplementary Figure 9: Summary statistics for the 8 plasticity groups and the control for *A. lyrata* (A,C,E) and *A. thaliana* (B,D,F). Significance between the groups was estimated based on pairwise comparison of 1000 bootstrap replicates, by using the union of the bootstrap values to calculate what proportion of the differences between the groups significantly differed from 0, multiplied by 2, to account for the fact that the test is one-sided. Box and whiskers depict the 75th and 95<sup>th</sup> interquartile ranges, respectively, dots show outliers. No shared letters mean that the groups are different with a significance cutoff at  $p < 0.05$ . Pvalues of all pairwise comparisons can be found in Supplementary data 7.

A) and B)  $\pi_n/\pi_s$ , C and D) Tajima's D for synonymous sites, E and F) Tajima's D for non-synonymous sites. G) index of interspecific change for nonsynonymous sites ( $(A. lyrata + 2) / ((A. thaliana + 2))$ ), H)  $ka/ks$  between *A. thaliana* and *A. lyrata*, I)  $ka$  and J)  $ks$ .

The plasticity classes OrthoMag, ParaMit and ParaMag were removed from analysis due to the low number of genes and the high variance between the bootstrap in these categories.

K) binned DFE for the control and 5 of the plasticity classes. 95% confidence intervals around the observed mean are based on 200 bootstrap replicates and depicted by error bars. P-values can be found in Supplementary Table 9.

No shared letters between plasticity groups indicates a significant difference between the groups.

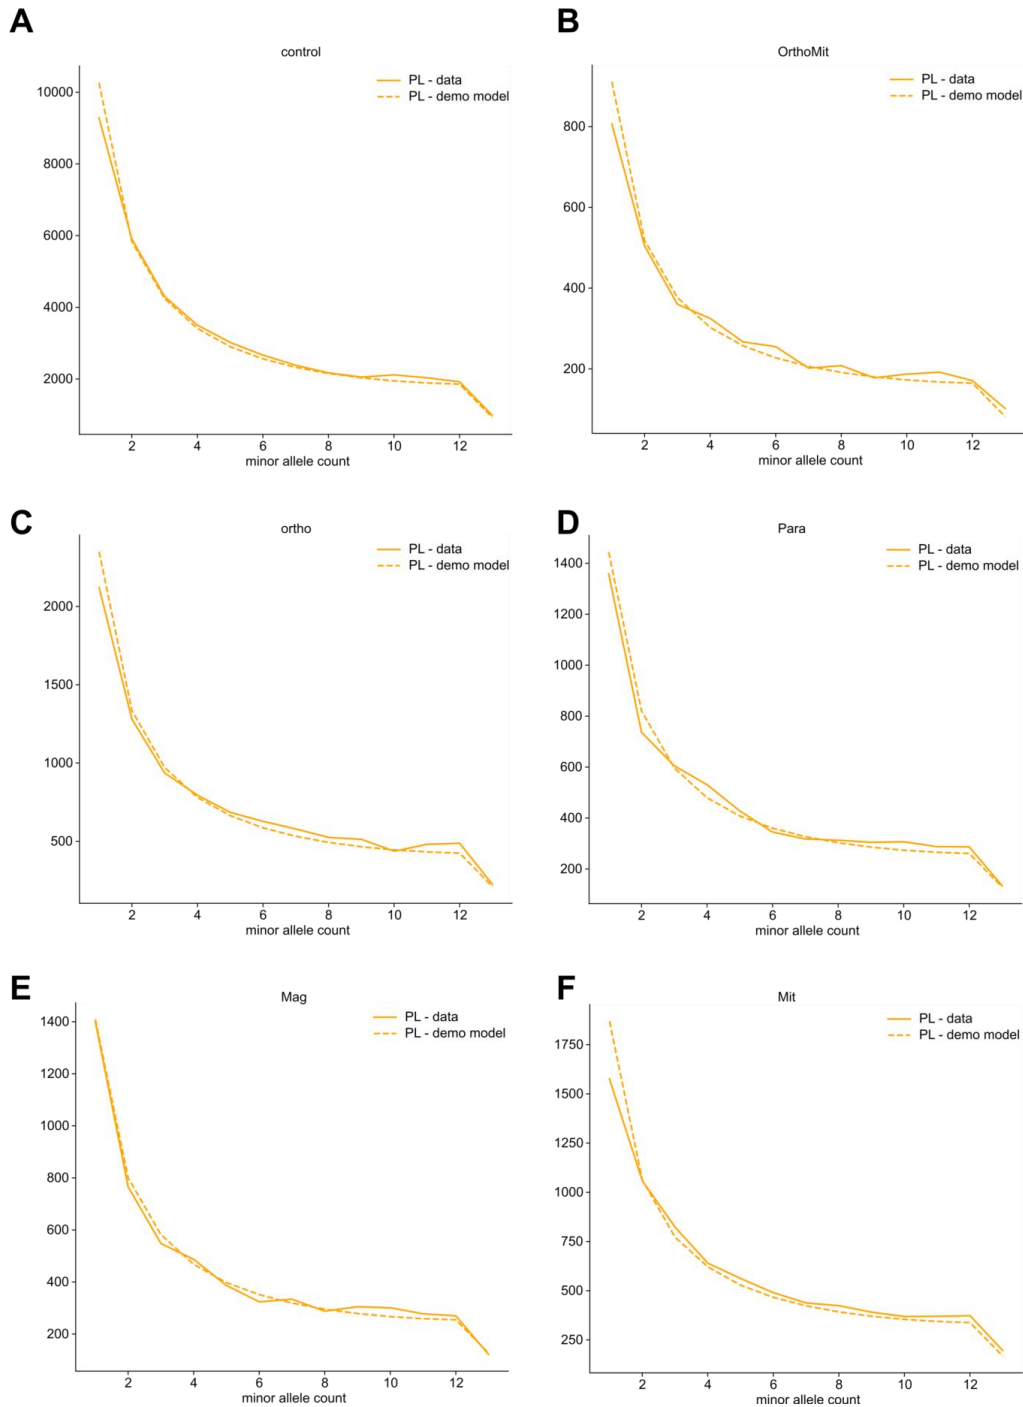

Supplementary Figure 10. Folded site frequency spectra for synonymous sites based on the data (solid line) and based on the expected number of sites of the demographic model (dashed line) for 5 sufficiently large gene sets, that grouped genes by their mode of plasticity evolution, as well as for the group of control genes, which had the same expression levels at all time points in all three species. A Genes with no change in response to stress (Control), B Genes with orthoplastic change in basal gene expression and mitigated response to stress (Ortho-Mit), C Genes with orthoplastic basal gene expression change (ortho), D Genes with paraplastic basal gene expression change (Para), E Genes with magnified response to stress (Mag), F genes with mitigated response to stress (Mit).

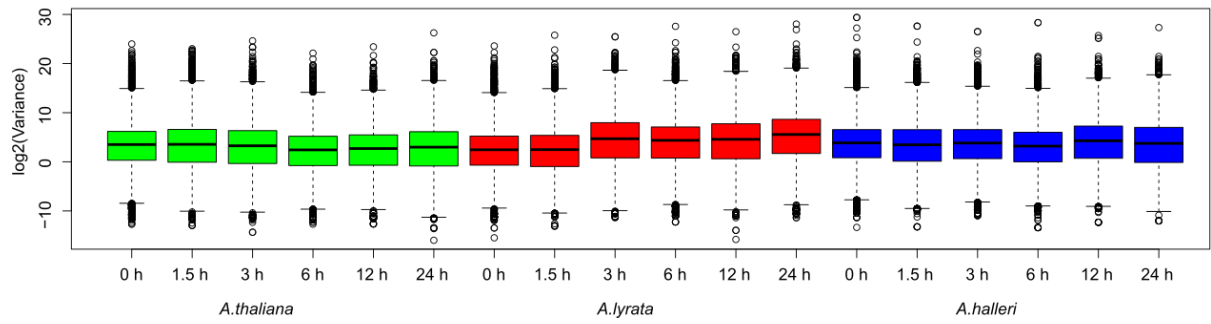

Supplementary Figure 11. **The variance of gene expression among biological replicates.** The variance of the expression level in the samples does not increase with the duration of exposure to the stress. The variance of each gene, in each species and at each time point, was calculated based on the four independent biological replicates of the experiment. Box and whiskers depict the 75<sup>th</sup> and 95<sup>th</sup> interquartile ranges, respectively; dots show outliers.

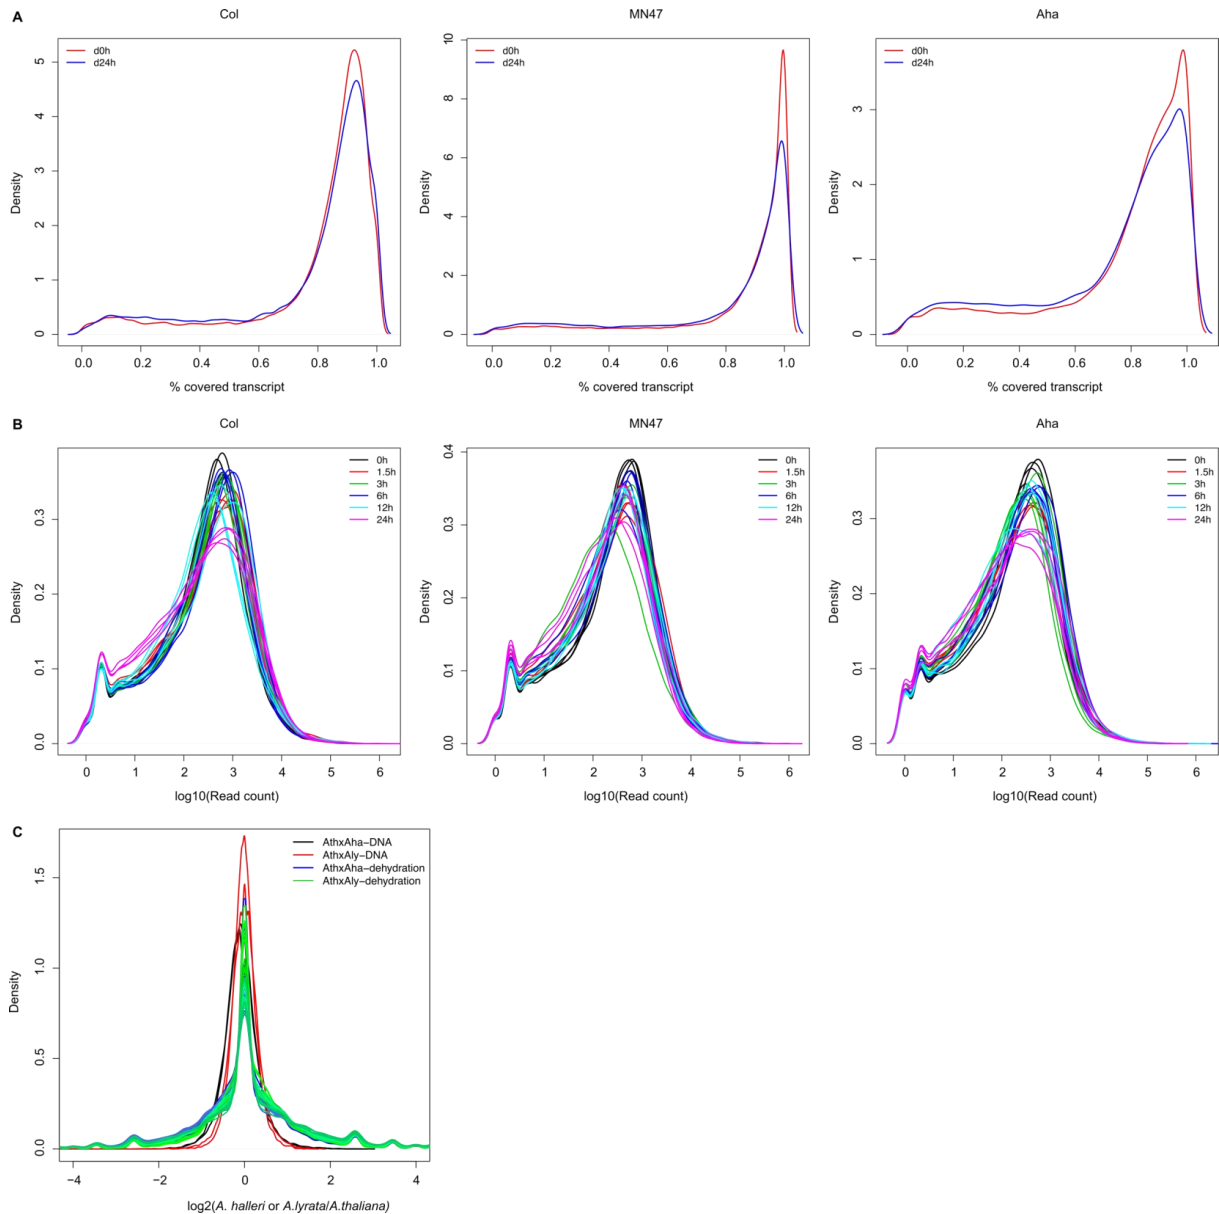

Supplementary Figure 12. **Data quality is comparable across samples.** (A) The proportion of the covered transcript at time point 0 hours (red) and time point 24 hours (blue) for the three species. (B) The distribution of the log<sub>10</sub> read count at all time points (0 hours – 24 hours) for the three species and (C) the distribution of the log<sub>2</sub> allele ratio in the F1s after remapping and low divergent region filter for the genomes (AthxAha – black; AthxAly – red) and the transcriptomes (AthxAha – blue; AthxAly – green).

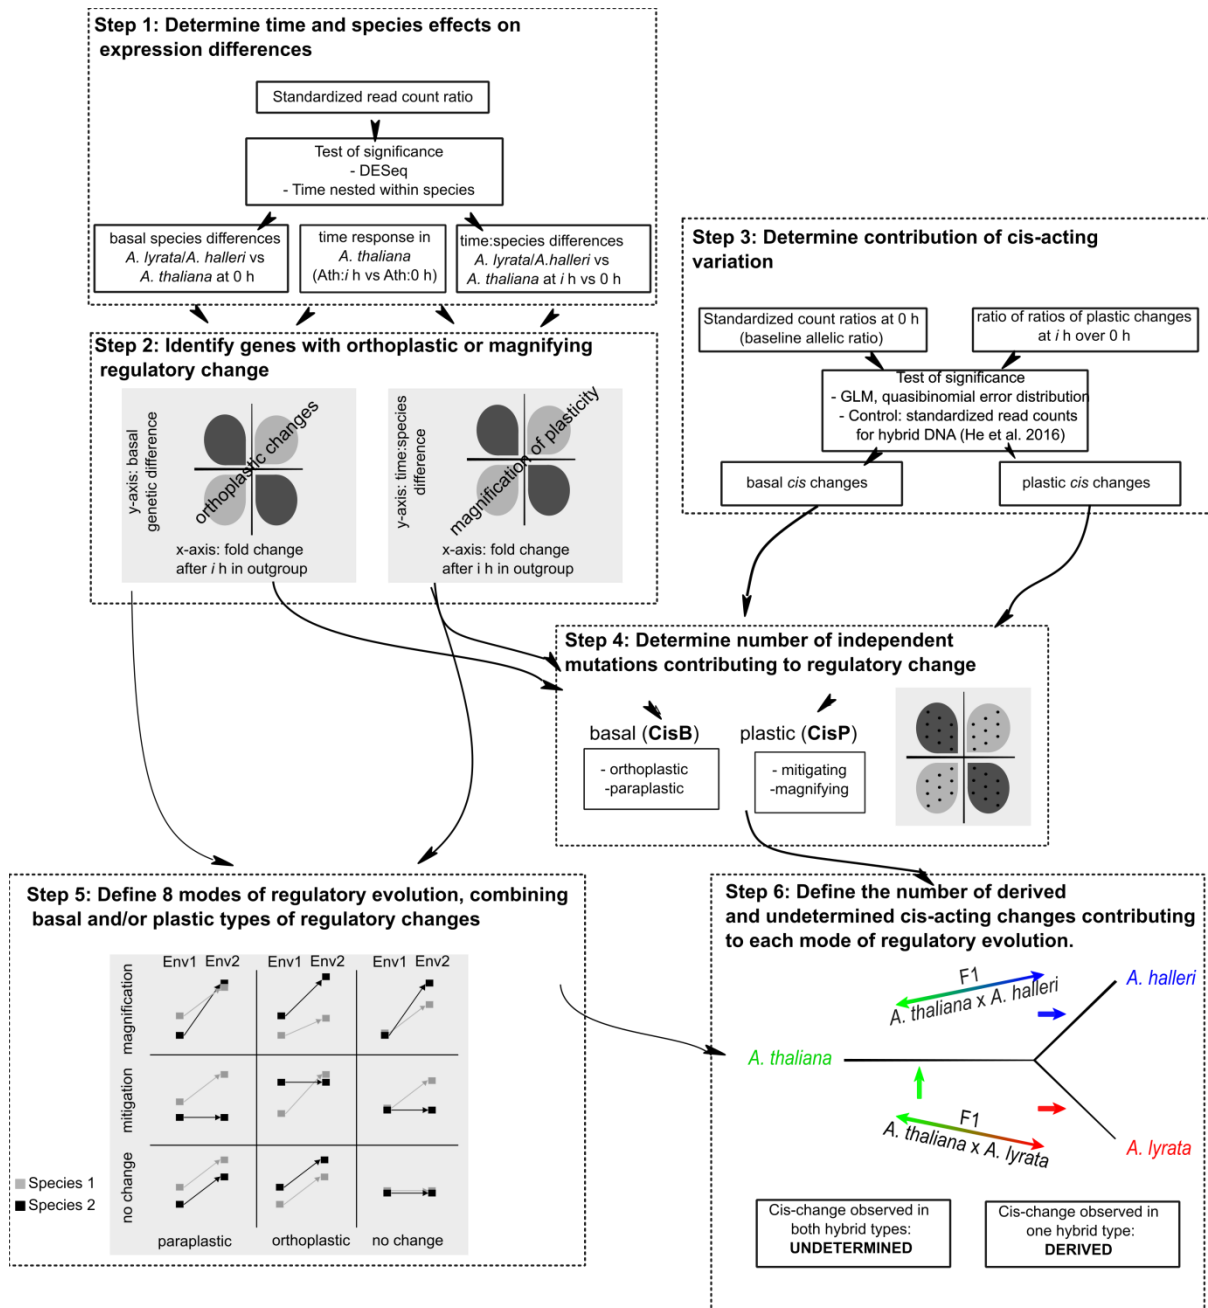

Supplementary Figure 13. Overview of the analytical pipeline to determine basal and plastic expression changes (step 1, step 2) and infer the number of independent *cis*-changes (Step 3, Step 4). Step 5: integration of analyses describing basal and plastic changes in gene regulation in *A. lyrata* and *A. halleri* to define 8 modes of plasticity evolution as well as a group of genes that do not show any differences. Step 6: inferring the derived state of the *cis*-changes observed.

Supplementary Table 1: Percentage of differentially expressed genes that overlap with the differentially expressed genes in Bouzid et al. (2019) for *A. halleri* and *A. lyrata*. The study included three different time points, 60% soil moisture (before the stress starts), 20% soil moisture (dehydration stress) and recovery (time point after rewatering). The percentage of up and down regulated in this study is in the top row. Significant overlap between the studies was tested using a hypergeometric test.

|                                          |                      |                        |                        |                         |                      |                      |
|------------------------------------------|----------------------|------------------------|------------------------|-------------------------|----------------------|----------------------|
|                                          |                      | A. halleri 1 vs 0 h    | A. halleri 3 vs 0 h    | A. halleri 6 vs 0 h     | A. halleri 12 vs 0 h | A. halleri 24 vs 0 h |
|                                          |                      | 22% up, 19% down       | 27% up, 24.9% down     | 26.5% up, 24.7% down    | 32.6% up, 30.8% down | 35% up, 34.8% down   |
| A. halleri 20 % vs 60 % soil moisture    | Up (127 ATG genes)   | 33%<br>p= 0.001815975  | 37%<br>p = 0.003911163 | 44%<br>p= 6.16E-06      | 57%<br>p= 2.48E-09   | 63.7%<br>p=9.60E-12  |
|                                          | Down (385 ATG genes) | 35%<br>p=1.23E-14      | 42.4%<br>p=6.33E-11    | 54%<br>p=7.49E-37       | 61%<br>p=2.87E-36    | 64%<br>p=4.56E-34    |
|                                          |                      | A. halleri 1 vs 0 h    | A. halleri 3 vs 0 h    | A. halleri 6 vs 0 h     | A. halleri 12 vs 0 h | A. halleri 24 vs 0 h |
|                                          |                      | 22% up, 19% down       | 27% up, 24.9% down     | 26.5% up, 24.7% down    | 32.6% up, 30.8% down | 35% up, 34.8% down   |
| A. halleri recovery vs 60 % soil         | Up (6 ATG genes)     | 0<br>n.s.              | 0<br>n.s.              | 0<br>n.s.               | 0<br>n.s.            | 0<br>n.s.            |
|                                          | Down ( 7 ATG genes)  | 28%<br>n.s.            | 42.8%<br>p= 0.03514445 | 28%<br>n.s.             | 14%<br>n.s.          | 14%<br>n.s.          |
|                                          |                      | A. lyrata 1 vs 0 h     | A. lyrata 3 vs 0 h     | A. lyrata 6 vs 0 h      | A. lyrata 12 vs 0 h  | A. lyrata 24 vs 0 h  |
|                                          |                      | 21.8% up; 22.5% down   | 32% up, 29% down       | 32.8% up, 30.9% down    | 35% up, 32% down     | 37% up, 31% down     |
| A. lyrata 20 % vs 60 % soil moisture     | Up (15 ATG genes)    | 40%<br>p= 0.0288373    | 46%<br>n.s.            | 53%<br>p= 0.02819508    | 53%<br>p= 4.51E-02   | 53%<br>n.s.          |
|                                          | Down (37 ATG genes)  | 18.9%<br>n.s.          | 13.5%<br>n.s.          | 13.5%<br>n.s.           | 18.9%<br>n.s.        | 16.2%<br>n.s.        |
|                                          |                      | A. lyrata 1 vs 0 h     | A. lyrata 3 vs 0 h     | A. lyrata 6 vs 0 h      | A. lyrata 12 vs 0 h  | A. lyrata 24 vs 0 h  |
|                                          |                      | 21.8% up; 22.5% down   | 32% up, 29% down       | 32.8% up, 30.9% down    | 35% up, 32% down     | 37% up, 31% down     |
| A. lyrata recovery vs 60 % soil moisture | Up (61 ATG genes)    | 32.7%<br>p= 0.01640409 | 29.5%<br>n.s.          | 34.4%<br>p= 5.94947E-40 | 34.4%<br>n.s.        | 36%<br>n.s.          |
|                                          | Down (90 ATG genes)  | 27.7%<br>n.s.          | 44.4%<br>p= 8.54E-04   | 44.4%<br>p= 2.25E-03    | 61%<br>p= 4.49E-09   | 51%<br>p= 2.26E-05   |



Supplementary Table 2: Proportion of stress-response genes in each species whose basal expression or slope (plastic difference) differs from another species. For each species, we counted the number of genes showing stress response comparing expression at tpx with tp0 (FDR 0.05), and then calculated how many of them showed an basal gene expression difference between species at tp0 (species1-tp0/species2-tp0) or a species differences in the slope of the plastic reaction between tpx and tp0 ((species1/species2-tpx)/(species1/species2-tp0) ) at FDR 0.05.

| Time point | Aha              |            |                    |            | Aly              |            |                    |            | Ath              |            |                    |            |
|------------|------------------|------------|--------------------|------------|------------------|------------|--------------------|------------|------------------|------------|--------------------|------------|
|            | basal difference |            | plastic difference |            | basal difference |            | plastic difference |            | basal difference |            | plastic difference |            |
|            | Aha vs Ath       | Aha vs Aly | Aha vs Ath         | Aha vs Aly | Aly vs Ath       | Aly vs Aha | Aly vs Ath         | Aly vs Aha | Ath vs Aha       | Ath vs Aly | Ath vs Aha         | Ath vs Aly |
| 1.5h       | 56.59%           | 52.75%     | 30.27%             | 11.36%     | 40.05%           | 52.68%     | 12.78%             | 13.62%     | 55.34%           | 38.98%     | 30.02%             | 13.08%     |
| 3h         | 55.88%           | 52.79%     | 34.75%             | 17.74%     | 39.86%           | 53.42%     | 30.78%             | 20.93%     | 57.38%           | 41.27%     | 34.57%             | 28.51%     |
| 6h         | 56.86%           | 53.42%     | 35.46%             | 22.74%     | 39.47%           | 53.21%     | 33.58%             | 27.05%     | 57.86%           | 40.73%     | 37.48%             | 32.31%     |
| 12h        | 56.32%           | 52.80%     | 45.71%             | 26.52%     | 40.20%           | 53.93%     | 34.14%             | 28.59%     | 57.35%           | 40.27%     | 48.22%             | 34.08%     |
| 24h        | 56.35%           | 52.97%     | 45.06%             | 31.43%     | 39.79%           | 53.60%     | 36.61%             | 30.55%     | 56.64%           | 39.32%     | 47.09%             | 38.82%     |

Supplementary Table 3: The Pearson's correlation (r) of log ratio of allelic expression difference between hybrid and parents computed separately for genes with a significant cis change and a significant difference between parents (cis), a significant difference between parents only (trans only) and a significant cis change in hybrid only (weak cis). At tp 0, the allelic difference is the ratio of expression difference in alleles between species (species1-tp0 / species2-tp0). At tpx, the allelic difference is the ratio of ratio of allelic difference of species between tpx and tp0 ( (species1/species2-tpx) / (speices1/species2-tp0) ). *Cis* means both of significant difference in the hybrid and parents with the same direction of changes. *Trans* means that there is no significant cis change in the hybrids. Compensatory means only differences between hybrid alleles not in parents, but they are still correlated to the parents. All correlations are highly significant  $p < 2.2e-16$ .

| Time point | Aha   |            |          | Aly   |            |          |
|------------|-------|------------|----------|-------|------------|----------|
|            | cis   | trans only | weak cis | cis   | trans only | weak cis |
| 0h         | 0.814 | 0.234      | 0.299    | 0.854 | 0.467      | 0.514    |
| 1.5h       | 0.851 | 0.244      | 0.483    | 0.952 | 0.478      | 0.722    |
| 3h         | 0.848 | 0.287      | 0.575    | 0.916 | 0.623      | 0.657    |
| 6h         | 0.868 | 0.297      | 0.563    | 0.911 | 0.636      | 0.631    |
| 12h        | 0.836 | 0.289      | 0.452    | 0.925 | 0.653      | 0.683    |
| 24h        | 0.849 | 0.324      | 0.552    | 0.921 | 0.551      | 0.683    |

Supplementary Table 4. GO enrichment of plastic genes in each mode of plasticity evolution in *A. halleri* and *A. lyrata* ( $p < 10^{-5}$ ). The mode of plasticity is determined by the combination of basal (orthoplasly / Paraplasly) and plastic (Magnification / Mitigation) changes. GO analysis was done using TopGO with the elim method. Enrichment were computed against the reference ensemble of all the expressed orthologous genes of three species. The GO term with less than 2 genes in the column “significant” were removed.

| GO.ID      | Term                                        | Annotated | Significant | Expected | resultFisher | basal       | platic        | species   |
|------------|---------------------------------------------|-----------|-------------|----------|--------------|-------------|---------------|-----------|
| GO:0009220 | pyrimidine ribonucleotide biosynthetic p... | 111       | 9           | 0.87     | 0.0000002    | Orthoplasly | Magnification | A.lyrata  |
| GO:0006270 | DNA replication initiation                  | 55        | 17          | 0.78     | 8E-19        | -           | Magnification | A.halleri |
| GO:0006275 | regulation of DNA replication               | 115       | 19          | 1.64     | 2.3E-15      | -           | Magnification | A.halleri |
| GO:0008283 | cell proliferation                          | 208       | 23          | 2.97     | 1.9E-14      | -           | Magnification | A.halleri |
| GO:0051567 | histone H3-K9 methylation                   | 152       | 19          | 2.17     | 4.4E-13      | -           | Magnification | A.halleri |
| GO:0006306 | DNA methylation                             | 143       | 16          | 2.04     | 1.9E-10      | -           | Magnification | A.halleri |
| GO:0009909 | regulation of flower development            | 284       | 21          | 4.05     | 6.2E-10      | -           | Magnification | A.halleri |
| GO:0034968 | histone lysine methylation                  | 193       | 27          | 2.75     | 4.1E-08      | -           | Magnification | A.halleri |
| GO:0016458 | gene silencing                              | 298       | 20          | 4.25     | 8.6E-08      | -           | Magnification | A.halleri |
| GO:0016572 | histone phosphorylation                     | 46        | 8           | 0.66     | 2.4E-07      | -           | Magnification | A.halleri |
| GO:0010389 | regulation of G2/M transition of mitotic... | 59        | 8           | 0.84     | 0.0000017    | -           | Magnification | A.halleri |
| GO:0010075 | regulation of meristem growth               | 136       | 11          | 1.94     | 0.0000038    | -           | Magnification | A.halleri |
| GO:0000911 | cytokinesis by cell plate formation         | 169       | 12          | 2.41     | 0.0000053    | -           | Magnification | A.halleri |
| GO:0032508 | DNA duplex unwinding                        | 10        | 4           | 0.14     | 0.0000078    | -           | Magnification | A.halleri |
| GO:0008283 | cell proliferation                          | 208       | 58          | 9.33     | 1E-30        | -           | Magnification | A.lyrata  |
| GO:0000911 | cytokinesis by cell plate formation         | 169       | 46          | 7.58     | 5.8E-24      | -           | Magnification | A.lyrata  |
| GO:0006275 | regulation of DNA replication               | 115       | 38          | 5.16     | 2.5E-23      | -           | Magnification | A.lyrata  |
| GO:0006270 | DNA replication initiation                  | 55        | 25          | 2.47     | 1E-19        | -           | Magnification | A.lyrata  |
| GO:0051567 | histone H3-K9 methylation                   | 152       | 39          | 6.82     | 1.8E-19      | -           | Magnification | A.lyrata  |
| GO:0006306 | DNA methylation                             | 143       | 34          | 6.41     | 4.9E-16      | -           | Magnification | A.lyrata  |
| GO:0010389 | regulation of G2/M transition of mitotic... | 59        | 22          | 2.65     | 2.7E-15      | -           | Magnification | A.lyrata  |
| GO:0010103 | stomatal complex morphogenesis              | 122       | 29          | 5.47     | 7.4E-14      | -           | Magnification | A.lyrata  |
| GO:0016572 | histone phosphorylation                     | 46        | 17          | 2.06     | 4.9E-12      | -           | Magnification | A.lyrata  |
| GO:0006261 | DNA-dependent DNA replication               | 204       | 53          | 9.15     | 3.6E-11      | -           | Magnification | A.lyrata  |
| GO:0009909 | regulation of flower development            | 284       | 39          | 12.74    | 3.7E-10      | -           | Magnification | A.lyrata  |
| GO:0019288 | isopentenyl diphosphate biosynthetic pro... | 188       | 29          | 8.43     | 4.9E-09      | -           | Magnification | A.lyrata  |
| GO:0007020 | microtubule nucleation                      | 52        | 14          | 2.33     | 4.1E-08      | -           | Magnification | A.lyrata  |
| GO:0009902 | chloroplast relocation                      | 89        | 18          | 3.99     | 6.3E-08      | -           | Magnification | A.lyrata  |
| GO:0051225 | spindle assembly                            | 40        | 12          | 1.79     | 0.0000001    | -           | Magnification | A.lyrata  |
| GO:0006364 | rRNA processing                             | 215       | 29          | 9.64     | 0.0000001    | -           | Magnification | A.lyrata  |
| GO:0010075 | regulation of meristem growth               | 136       | 22          | 6.1      | 1.5E-07      | -           | Magnification | A.lyrata  |
| GO:0009965 | leaf morphogenesis                          | 176       | 25          | 7.89     | 2.9E-07      | -           | Magnification | A.lyrata  |
| GO:0000226 | microtubule cytoskeleton organization       | 200       | 44          | 8.97     | 9.5E-07      | -           | Magnification | A.lyrata  |
| GO:0006084 | acetyl-CoA metabolic process                | 66        | 14          | 2.96     | 0.000001     | -           | Magnification | A.lyrata  |
| GO:0007169 | transmembrane receptor protein tyrosine ... | 87        | 16          | 3.9      | 0.0000013    | -           | Magnification | A.lyrata  |
| GO:0032508 | DNA duplex unwinding                        | 10        | 6           | 0.45     | 0.0000014    | -           | Magnification | A.lyrata  |
| GO:0009220 | pyrimidine ribonucleotide biosynthetic p... | 111       | 18          | 4.98     | 0.000002     | -           | Magnification | A.lyrata  |
| GO:0006412 | translation                                 | 304       | 122         | 34.96    | 1E-30        | Orthoplasly | -             | A.halleri |
| GO:0019288 | isopentenyl diphosphate biosynthetic pro... | 188       | 73          | 21.62    | 1.9E-22      | Orthoplasly | -             | A.halleri |
| GO:0006364 | rRNA processing                             | 215       | 79          | 24.72    | 2E-22        | Orthoplasly | -             | A.halleri |
| GO:0010027 | thylakoid membrane organization             | 162       | 54          | 18.63    | 1.1E-13      | Orthoplasly | -             | A.halleri |
| GO:001510  | RNA methylation                             | 116       | 43          | 13.34    | 6.1E-13      | Orthoplasly | -             | A.halleri |
| GO:0015995 | chlorophyll biosynthetic process            | 107       | 40          | 12.3     | 2.9E-12      | Orthoplasly | -             | A.halleri |
| GO:0042254 | ribosome biogenesis                         | 262       | 101         | 30.13    | 4.3E-10      | Orthoplasly | -             | A.halleri |
| GO:0010207 | photosystem II assembly                     | 139       | 42          | 15.98    | 1.9E-09      | Orthoplasly | -             | A.halleri |
| GO:0016226 | iron-sulfur cluster assembly                | 83        | 30          | 9.54     | 3.8E-09      | Orthoplasly | -             | A.halleri |
| GO:0009658 | chloroplast organization                    | 202       | 65          | 23.23    | 4E-09        | Orthoplasly | -             | A.halleri |

|            |                                             |     |     |       |           |             |   |           |
|------------|---------------------------------------------|-----|-----|-------|-----------|-------------|---|-----------|
| GO:0045036 | protein targeting to chloroplast            | 57  | 24  | 6.55  | 4.1E-09   | Orthoplasmy | - | A.halleri |
| GO:0016117 | carotenoid biosynthetic process             | 86  | 30  | 9.89  | 1E-08     | Orthoplasmy | - | A.halleri |
| GO:0006636 | unsaturated fatty acid biosynthetic proc... | 55  | 23  | 6.32  | 1E-08     | Orthoplasmy | - | A.halleri |
| GO:0019344 | cysteine biosynthetic process               | 158 | 44  | 18.17 | 1.3E-08   | Orthoplasmy | - | A.halleri |
| GO:0009657 | plastid organization                        | 327 | 109 | 37.6  | 2.6E-08   | Orthoplasmy | - | A.halleri |
| GO:0010103 | stomatal complex morphogenesis              | 122 | 36  | 14.03 | 5.4E-08   | Orthoplasmy | - | A.halleri |
| GO:0009073 | aromatic amino acid family biosynthetic ... | 79  | 27  | 9.08  | 8.9E-08   | Orthoplasmy | - | A.halleri |
| GO:0009902 | chloroplast relocation                      | 89  | 29  | 10.23 | 9.9E-08   | Orthoplasmy | - | A.halleri |
| GO:0006399 | tRNA metabolic process                      | 92  | 36  | 10.58 | 2.5E-07   | Orthoplasmy | - | A.halleri |
| GO:0006098 | pentose-phosphate shunt                     | 155 | 39  | 17.82 | 0.0000015 | Orthoplasmy | - | A.halleri |
| GO:0009220 | pyrimidine ribonucleotide biosynthetic p... | 111 | 31  | 12.76 | 0.0000017 | Orthoplasmy | - | A.halleri |
| GO:0006655 | phosphatidylglycerol biosynthetic proces... | 58  | 20  | 6.67  | 0.0000035 | Orthoplasmy | - | A.halleri |
| GO:0042274 | ribosomal small subunit biogenesis          | 11  | 8   | 1.26  | 0.0000036 | Orthoplasmy | - | A.halleri |
| GO:0006418 | tRNA aminoacylation for protein translat... | 37  | 15  | 4.25  | 0.000006  | Orthoplasmy | - | A.halleri |
| GO:0042793 | plastid transcription                       | 66  | 21  | 7.59  | 0.0000086 | Orthoplasmy | - | A.halleri |
| GO:0001510 | RNA methylation                             | 116 | 29  | 9.29  | 2.2E-08   | Orthoplasmy | - | A.lyrata  |
| GO:0006412 | translation                                 | 304 | 47  | 24.36 | 0.0000088 | Orthoplasmy | - | A.lyrata  |
| GO:0006914 | autophagy                                   | 56  | 15  | 3.27  | 4.7E-07   | Paraplasmy  | - | A.lyrata  |
| GO:0010200 | response to chitin                          | 292 | 37  | 17.07 | 0.000007  | Paraplasmy  | - | A.lyrata  |

Supplementary Table 5. GO enrichment of plastic genes with derived or undetermined cis changes in each mode of plasticity evolution in *A. halleri* and *A. lyrata*. The mode of plasticity evolution is determined by the combination of basal (**Orthoplas** / **Paraplas**) and plastic (**Magnification** / **Mitigation**) changes. GO analysis was done using TopGO with the elim method. Enrichment were computed against the reference ensemble of all the expressed orthologous genes of three species. The GO term with less than 2 genes in the column “significant” were removed.

| GO.ID      | Term                                        | Annotated | Significant | Expected | resultFisher | basal | plastic | cis    |
|------------|---------------------------------------------|-----------|-------------|----------|--------------|-------|---------|--------|
| GO:0001510 | RNA methylation                             | 116       | 3           | 0.21     | 0.0011       | Ortho | Mag     | AH der |
| GO:0016572 | histone phosphorylation                     | 46        | 2           | 0.08     | 0.0031       | Ortho | Mag     | AH der |
| GO:0006333 | chromatin assembly or disassembly           | 50        | 2           | 0.09     | 0.0036       | Ortho | Mag     | AH der |
| GO:0006636 | unsaturated fatty acid biosynthetic proc... | 55        | 2           | 0.1      | 0.0044       | Ortho | Mag     | AH der |
| GO:0008283 | cell proliferation                          | 208       | 3           | 0.38     | 0.006        | Ortho | Mag     | AH der |
| GO:0009220 | pyrimidine ribonucleotide biosynthetic p... | 111       | 5           | 0.35     | 2.30E-05     | Ortho | Mag     | AL der |
| GO:0008654 | phospholipid biosynthetic process           | 306       | 5           | 0.96     | 2.50E-03     | Ortho | Mag     | AL der |
| GO:0046148 | pigment biosynthetic process                | 219       | 4           | 0.69     | 4.70E-03     | Ortho | Mag     | AL der |
| GO:0010383 | cell wall polysaccharide metabolic proce... | 177       | 3           | 0.26     | 0.0021       | -     | Mag     | AH der |
| GO:0009736 | cytokinin-activated signaling pathway       | 59        | 2           | 0.09     | 0.0034       | -     | Mag     | AH der |
| GO:0042546 | cell wall biogenesis                        | 268       | 3           | 0.4      | 0.0068       | -     | Mag     | AH der |
| GO:0010207 | photosystem II assembly                     | 139       | 10          | 1.43     | 1.60E-06     | -     | Mag     | AL der |
| GO:0006364 | rRNA processing                             | 215       | 12          | 2.22     | 2.10E-06     | -     | Mag     | AL der |
| GO:0016998 | cell wall macromolecule catabolic proces... | 10        | 4           | 0.1      | 2.20E-06     | -     | Mag     | AL der |
| GO:0010103 | stomatal complex morphogenesis              | 122       | 9           | 1.26     | 4.50E-06     | -     | Mag     | AL der |
| GO:0035304 | regulation of protein dephosphorylation     | 114       | 8           | 1.17     | 2.20E-05     | -     | Mag     | AL der |
| GO:0019288 | isopentenyl diphosphate biosynthetic pro... | 188       | 10          | 1.94     | 2.40E-05     | -     | Mag     | AL der |
| GO:0009965 | leaf morphogenesis                          | 176       | 9           | 1.81     | 8.40E-05     | -     | Mag     | AL der |
| GO:0043085 | positive regulation of catalytic activit... | 104       | 7           | 1.07     | 9.70E-05     | -     | Mag     | AL der |
| GO:0019344 | cysteine biosynthetic process               | 158       | 8           | 1.63     | 2.20E-04     | -     | Mag     | AL der |
| GO:0045893 | positive regulation of transcription, DN... | 356       | 12          | 3.67     | 3.00E-04     | -     | Mag     | AL der |
| GO:0040034 | regulation of development, heterochronic    | 32        | 2           | 0.06     | 0.0015       | Para  | Mag     | AH der |
| GO:0048767 | root hair elongation                        | 143       | 3           | 0.26     | 0.0021       | Para  | Mag     | AH der |
| GO:0009059 | macromolecule biosynthetic process          | 2572      | 11          | 4.66     | 0.0026       | Para  | Mag     | AH der |
| GO:0034968 | histone lysine methylation                  | 193       | 5           | 1.08     | 4.50E-03     | Para  | Mag     | AL der |
| GO:0007000 | nucleolus organization                      | 19        | 2           | 0.11     | 5.00E-03     | Para  | Mag     | AL der |
| GO:0009072 | aromatic amino acid family metabolic pro... | 167       | 11          | 3.14     | 0.00031      | Ortho | Mit     | AH der |
| GO:1901606 | alpha-amino acid catabolic process          | 110       | 8           | 2.07     | 0.00109      | Ortho | Mit     | AH der |
| GO:0010363 | regulation of plant-type hypersensitive ... | 275       | 13          | 5.17     | 0.0021       | Ortho | Mit     | AH der |
| GO:0006612 | protein targeting to membrane               | 276       | 13          | 5.19     | 0.00217      | Ortho | Mit     | AH der |

|            |                                             |      |    |       |         |       |     |        |
|------------|---------------------------------------------|------|----|-------|---------|-------|-----|--------|
| GO:0009651 | response to salt stress                     | 571  | 21 | 10.73 | 0.00254 | Ortho | Mit | AH der |
| GO:0006972 | hyperosmotic response                       | 193  | 10 | 3.63  | 0.00353 | Ortho | Mit | AH der |
| GO:0010033 | response to organic substance               | 1978 | 53 | 37.18 | 0.00386 | Ortho | Mit | AH der |
| GO:0009963 | positive regulation of flavonoid biosynt... | 80   | 6  | 1.5   | 0.0039  | Ortho | Mit | AH der |
| GO:0046474 | glycerophospholipid biosynthetic process    | 137  | 8  | 2.57  | 0.00432 | Ortho | Mit | AH der |
| GO:0046885 | regulation of hormone biosynthetic proce... | 18   | 3  | 0.34  | 0.00434 | Ortho | Mit | AH der |
| GO:0009593 | detection of chemical stimulus              | 13   | 3  | 0.15  | 0.00038 | Ortho | Mit | AL der |
| GO:0006984 | ER-nucleus signaling pathway                | 12   | 3  | 0.15  | 0.00041 | Ortho | -   | AH der |
| GO:0006364 | rRNA processing                             | 215  | 10 | 2.73  | 0.00041 | Ortho | -   | AH der |
| GO:0019288 | isopentenyl diphosphate biosynthetic pro... | 188  | 9  | 2.39  | 0.00065 | Ortho | -   | AH der |
| GO:0045036 | protein targeting to chloroplast            | 57   | 5  | 0.72  | 0.00076 | Ortho | -   | AH der |
| GO:0006790 | sulfur compound metabolic process           | 534  | 16 | 6.78  | 0.00123 | Ortho | -   | AH der |
| GO:1901566 | organonitrogen compound biosynthetic pro... | 1464 | 35 | 18.59 | 0.00161 | Ortho | -   | AH der |
| GO:0015931 | nucleobase-containing compound transport    | 108  | 6  | 1.37  | 0.00251 | Ortho | -   | AH der |
| GO:0006006 | glucose metabolic process                   | 198  | 8  | 2.51  | 0.00375 | Ortho | -   | AH der |
| GO:0009658 | chloroplast organization                    | 202  | 8  | 2.56  | 0.00423 | Ortho | -   | AH der |
| GO:0015994 | chlorophyll metabolic process               | 161  | 7  | 2.04  | 0.00444 | Ortho | -   | AH der |
| GO:0042138 | meiotic DNA double-strand break formatio... | 62   | 4  | 0.5   | 0.0015  | Para  | -   | AH der |
| GO:0006312 | mitotic recombination                       | 45   | 3  | 0.36  | 0.0055  | Para  | -   | AH der |
| GO:0009560 | embryo sac egg cell differentiation         | 111  | 6  | 1.03  | 0.00059 | Para  | -   | AL der |
| GO:0001101 | response to acid chemical                   | 1084 | 26 | 15.28 | 0.005   | -     | Mit | AH der |
| GO:0014070 | response to organic cyclic compound         | 516  | 15 | 7.27  | 0.0063  | -     | Mit | AH der |
| GO:0006766 | vitamin metabolic process                   | 72   | 6  | 0.91  | 0.0003  | -     | Mit | AL der |
| GO:0009269 | response to desiccation                     | 22   | 3  | 0.28  | 0.0026  | -     | Mit | AL der |
| GO:0009845 | seed germination                            | 193  | 8  | 2.45  | 0.0032  | -     | Mit | AL der |
| GO:0009106 | lipoate metabolic process                   | 27   | 3  | 0.34  | 0.0047  | -     | Mit | AL der |
| GO:0009072 | aromatic amino acid family metabolic pro... | 167  | 7  | 2.12  | 0.0054  | -     | Mit | AL der |
| GO:0031667 | response to nutrient levels                 | 218  | 8  | 2.77  | 0.0066  | -     | Mit | AL der |
| GO:0009638 | phototropism                                | 10   | 2  | 0.13  | 0.0067  | -     | Mit | AL der |

Supplementary Table 6: The proportion of mapped RNAseq reads for the three species and the F1 hybrids with different reference genomes. As the draft genome of *A. halleri* v1.1 in Phytozome 12.1 can not cover the whole transcriptome of *A. halleri*, we used the *A. lyrata* genome as the reference for *A. halleri* and its hybrid. We further generated an *A. halleri* pseudo genome (see method) and used it as a reference for *A. halleri* and its hybrid. The pseudogenome increases the mapping efficiency.

| Genotype | Reference    | 0h  | 1.5h | 3h  | 6h  | 12h | 24h |
|----------|--------------|-----|------|-----|-----|-----|-----|
| Ath      | A. thaliana  | 92% | 92%  | 92% | 92% | 91% | 90% |
| Aly      | A.lyrata     | 90% | 90%  | 90% | 89% | 88% | 87% |
| Aha      | A.lyrata     | 70% | 70%  | 70% | 70% | 68% | 67% |
| Aha      | pseudo gene  | 90% | 90%  | 90% | 90% | 89% | 88% |
| AthXAly  | thxAly genom | 90% | 90%  | 90% | 90% | 89% | 88% |
| AthxAha  | thxAly genom | 80% | 80%  | 80% | 80% | 79% | 78% |
| AthxAha  | ha pseudoge  | 89% | 89%  | 89% | 89% | 88% | 88% |

Supplementary Table 7: The gene number and contribution of basal/plastic cis changes for each mode of plasticity evolution. CisB is basal cis change, cisP is plastic cis change, and cisBP is both of basal and plastic change.

| Mode of plasticity evolution | Genes | A.halleri |      |       | A.lyrata |      |      | cisBP |
|------------------------------|-------|-----------|------|-------|----------|------|------|-------|
|                              |       | cisB      | cisP | cisBP | Genes    | cisB | cisP |       |
| orthoplasmy - magnification  | 119   | 19        | 35   | 7     | 118      | 37   | 25   | 13    |
| magnification                | 209   | -         | 74   | -     | 629      | -    | 222  | -     |
| paraplasmy - magnification   | 109   | 19        | 20   | 29    | 208      | 45   | 45   | 56    |
| orthoplasmy - mitigation     | 1205  | 99        | 329  | 248   | 679      | 60   | 195  | 230   |
| orthoplasmy                  | 1662  | 393       | -    | -     | 1178     | 475  | -    | -     |
| paraplasmy                   | 975   | 252       | -    | -     | 860      | 315  | -    | -     |
| paraplasmy - mitigation      | 564   | 64        | 185  | 49    | 219      | 42   | 58   | 46    |
| mitigation                   | 796   | -         | 406  | -     | 735      | -    | 442  | -     |



Supplementary Table 8 List of plant populations and their geographical distribution of the dehydration experiment in Supplementary Figure 1.

| Species            | Population | Accession     | Location | Latitude | Longitude |
|--------------------|------------|---------------|----------|----------|-----------|
| <i>A. halleri</i>  | Laut       | Laut3         | Germany  | 49.23    | 14.04     |
| <i>A. halleri</i>  | Wall       | Wall7         | Germany  | 49.73    | 12.91     |
| <i>A. halleri</i>  | Kowa       | Kowa4         | Poland   | 50.63    | 16.08     |
| <i>A. halleri</i>  | Bara       | Bara4         | Romania  | 45.55    | 22.9      |
| <i>A. halleri</i>  | Nisu       | Nisu6         | Romania  | 46.24    | 22.55     |
| <i>A. halleri</i>  | lita       | Lita6         | Slovenia | 46.76    | 15.79     |
| <i>A. halleri</i>  | Lobn       | Lobn5         | Slovenia | 46.69    | 16.16     |
| <i>A. halleri</i>  | Noss       | Noss5         | Italy    | 44.28    | 14.96     |
| <i>A. halleri</i>  | Pais       | Pais9         | Italy    | 46.05    | 10.24     |
| <i>A. halleri</i>  | hal4.11    | hal4.11       | Italy    | 45.86    | 9.84      |
| <i>A. lyrata</i>   | SB         | SB12          | Germany  | 51.31    | 10.55     |
| <i>A. lyrata</i>   | LF         | LF10          | Austria  | 47.59    | 15.36     |
| <i>A. lyrata</i>   | LF         | LF2           | Austria  | 47.59    | 15.36     |
| <i>A. lyrata</i>   | NT         | NT12          | Germany  | 49.31    | 11.32     |
| <i>A. lyrata</i>   | VH         | Vosshütte     | Austria  | 47.58    | 16.1      |
| <i>A. lyrata</i>   |            | Tannenberg1   |          |          |           |
| <i>A. lyrata</i>   | VOS        | VOS           | Austria  | 57.58    | 16. Okt   |
| <i>A. lyrata</i>   | Plech      | Plech.Rock79b | Germany  | 49.37    | 11.3      |
| <i>A. lyrata</i>   | Plech      | Plech61.2a    | Germany  | 49.37    | 11.3      |
| <i>A. lyrata</i>   | Plech      | Plech91.4a    | Germany  | 49.37    | 11.3      |
| <i>A. lyrata</i>   | Plech      | Plech92.2a    | Germany  | 49.37    | 11.3      |
| <i>A. lyrata</i>   | Plech      | PlechC3       | Germany  | 49.37    | 11.3      |
| <i>A. lyrata</i>   | HAS        | HAS.120       | Germany  | 49.47    | 11.25     |
| <i>A. lyrata</i>   | HAS        | HAS122c       | Germany  | 49.47    | 11.25     |
| <i>A. lyrata</i>   | HAS        | HAS166b       | Germany  | 49.47    | 11.25     |
| <i>A. lyrata</i>   | MN47       | MN47          | US       | 44.31    | -85.6     |
| <i>A. lyrata</i>   | Sky        | Sky           | Scotland | 57.54    | -6.17     |
| <i>A. thaliana</i> | IP-Ara-4   | IP.Ara4       | Spain    | 41.7     | -3.68     |

|                    |          |         |       |       |       |
|--------------------|----------|---------|-------|-------|-------|
| <i>A. thaliana</i> | IP-Cmo-3 | IP.Cmo3 | Spain | 40.05 | -4.65 |
| <i>A. thaliana</i> | IP-Hoy-0 | IP.Hoy0 | Spain | 40.4  | -5    |
| <i>A. thaliana</i> | IP-lab-7 | IP.Lab7 | Spain | 40.87 | -4.5  |
| <i>A. thaliana</i> | Amu-0    | Amu0    | Spain | 42.35 | -3.03 |
| <i>A. thaliana</i> | Coy-0    | Coy0    | Spain | 40.44 | -4.27 |
| <i>A. thaliana</i> | Gud-3    | Gud3    | Spain | 40.65 | -4.11 |
| <i>A. thaliana</i> | Hec-0    | Hec0    | Spain | 42.86 | -0.7  |
| <i>A. thaliana</i> | Pdl-0    | Pdl0    | Spain | 43.02 | -5.6  |
| <i>A. thaliana</i> | Prd-0    | Prd0    | Spain | 41.14 | -3.68 |
| <i>A. thaliana</i> | Som-0    | Som0    | Spain | 41.14 | -3.58 |
| <i>A. thaliana</i> | Urd-1    | Urd1    | Spain | 42.27 | -2.98 |
| <i>A. thaliana</i> | Val-0    | Val0    | Spain | 42.31 | -3.1  |
| <i>A. thaliana</i> | Col.FRI  | Col.FRI | NA    | NA    | NA    |

Supplementary Table 9: Pvalues for pairwise comparisons of the bins of the different plasticity categories and the control genes for the DFE in Supplementary Figure 9.

|            |             |             |      |             |             |
|------------|-------------|-------------|------|-------------|-------------|
| bin 0-1    | ortho-mit   | ortho       | para | mag         | mit         |
| control    | 0.43        | 0.61        | 0.61 | <b>0.01</b> | 0.41        |
| ortho-mit  | NA          | 0.76        | 0.82 | <b>0.01</b> | 0.25        |
| ortho      |             | NA          | 0.98 | <b>0.01</b> | 0.25        |
| para       |             |             | NA   | <b>0.01</b> | 0.27        |
| mag        |             |             |      | NA          | 0.09        |
|            |             |             |      |             |             |
|            |             |             |      |             |             |
| bin 1-10   | ortho-mit   | ortho       | para | mag         | mit         |
| control    | <b>0.03</b> | <b>0.01</b> | 0.17 | 0.32        | 0.15        |
| ortho-mit  | NA          | 0.98        | 0.7  | <b>0.04</b> | 0.51        |
| ortho      |             | NA          | 0.55 | <b>0.01</b> | 0.38        |
| para       |             |             | NA   | 0.09        | 0.81        |
| mag        |             |             |      | NA          | <b>0.03</b> |
|            |             |             |      |             |             |
|            |             |             |      |             |             |
| bin 10-inf | ortho-mit   | ortho       | para | mag         | mit         |
| control    | 0.18        | <b>0.01</b> | 0.26 | 0.37        | <b>0.02</b> |
| ortho-mit  | NA          | 0.5         | 0.95 | 0.99        | 0.55        |
| ortho      |             | NA          | 0.39 | 0.62        | 0.93        |
| para       |             |             | NA   | 0.97        | 0.45        |
| mag        |             |             |      | NA          | 0.48        |
